# Supplementary material
Source: HighWire-hosted journal article supplement (https://bmjopen.bmj.com/content/15/4/e088160)
Supplement: inline-supplementary-material-2 [file inline-supplementary-material-2.pdf]

Supplementary Document 2

Manuscript: Perceptions of Participants and Organizers of a Social Prescribing Program for Hospital Staff through Horticulture (SP4S-H) in the Community Hospitals in Singapore – A Qualitative Study

Consolidated criteria for reporting qualitative studies (COREQ): 32-item checklist<sup>1</sup>

<sup>1</sup> Tong et al. Consolidated criteria for reporting qualitative research (COREQ): a 32-item checklist for interviews and focus groups. *International Journal for Quality in Health Care*. 2007. Volume 19, Number 6: pp. 349 – 357

| No. Item                                | Guide questions/description                            | Comments(Section, Page number)                                                                                                           |
|-----------------------------------------|--------------------------------------------------------|------------------------------------------------------------------------------------------------------------------------------------------|
| Domain 1: Research team and reflexivity |                                                        |                                                                                                                                          |
| Personal Characteristics                |                                                        |                                                                                                                                          |
| 1. Interviewer/ facilitator             | Which author/s conducted the interview or focus group? | AWPA; TMH (Data analysis, Page 9)                                                                                                        |
| 2. Credentials                          | What were the researcher’s credentials? E.g. PhD, MD   | AWPY: MBBS<br>TMH: Bsc (Sociology)<br>SSSY: PhD (Public Health)<br>(Data analysis, Page 9)                                               |
| 3. Occupation                           | What was their occupation at the time of the study?    | AWPA: Family Physician<br>TMH: Research Officer<br>SSSY: Research Fellow<br>(Data analysis, Page 9)                                      |
| 4. Gender                               | Was the researcher male or female?                     | AWPA: Male<br>TMH; SSSY: Female<br>(Data analysis, Page 9)                                                                               |
| 5. Experience and training              | What experience or training did the researcher have?   | AWPA: Trains the lay in social prescribing<br>TMH; SSSY: key investigators in many national and cluster-wide health and social research, |

|                                             |                                                                                                                                                          |                                                                                                                                                 |
|---------------------------------------------|----------------------------------------------------------------------------------------------------------------------------------------------------------|-------------------------------------------------------------------------------------------------------------------------------------------------|
|                                             |                                                                                                                                                          | including on SP<br>(Data analysis, Page 9)                                                                                                      |
| <i>Relationship with participants</i>       |                                                                                                                                                          |                                                                                                                                                 |
| 6. Relationship established                 | Was a relationship established prior to study commencement?                                                                                              | Researchers and participants are colleagues in the same company<br>(Data analysis, Page 9)                                                      |
| 7. Participant knowledge of the interviewer | What did the participants know about the researcher? e.g. personal goals, reasons for doing the research                                                 | The participants understand the reasons for performing the research, based on the consent form<br><br>(Research participants, Page 7)           |
| 8. Interviewer characteristics              | What characteristics were reported about the interviewer/ facilitator? e.g. Bias, assumptions, reasons and interests in the research topic               | The interviewers are interested to know about participant's perceptions about SP4S-H as part of program evaluation.<br>(Introduction, page 6-7) |
| <b>Domain 2: Study Design</b>               |                                                                                                                                                          |                                                                                                                                                 |
| <i>Theoretical framework</i>                |                                                                                                                                                          |                                                                                                                                                 |
| 9. Methodological orientation and Theory    | What methodological orientation was stated to underpin the study? e.g. grounded theory, discourse analysis, ethnography, phenomenology, content analysis | Methodology: Thematic analysis by Braun and Clarke (2006)<br>Theoretical framework: REAIM<br>(Data analysis, Page 8)                            |
| <i>Participant selection</i>                |                                                                                                                                                          |                                                                                                                                                 |
| 10. Sampling                                | How were participants selected? e.g., purposive, convenience, consecutive, snowball                                                                      | Convenience sampling<br><br>(Research participants, Page 8)                                                                                     |
| 11. Method of approach                      | How were participants approached? e.g., face-to-face, telephone, mail, email                                                                             | Email<br>(Research participants, Page 8)                                                                                                        |

|                                  |                                                                                   |                                                                                                                                                                                                                   |
|----------------------------------|-----------------------------------------------------------------------------------|-------------------------------------------------------------------------------------------------------------------------------------------------------------------------------------------------------------------|
| 12. Sample size                  | How many participants were in the study?                                          | 26<br>(Participant characteristics, Page 10)                                                                                                                                                                      |
| 13. Non-participation            | How many people refused to participate or dropped out? Reasons?                   | 7 (of which 4 were uncomfortable with interviews; 3 had conflicts with their existing schedules)<br>(Participant characteristics, Page 10)                                                                        |
| <i>Setting</i>                   |                                                                                   |                                                                                                                                                                                                                   |
| 14. Setting of data collection   | Where was the data collected? e.g. home, clinic, workplace                        | Virtual meeting (Zoom)<br>(Participant characteristics, Page 10)                                                                                                                                                  |
| 15. Presence of non-participants | Was anyone else present besides the participants and researchers?                 | No<br>(Participant characteristics, Page 10)                                                                                                                                                                      |
| 16. Description of sample        | What are the important characteristics of the sample? e.g. demographic data, date | Age, gender, ethnicity, occupation, years of service in current setting, role in SP4S-H; status of completion in SP4S-H competition (for participants only)<br>(Table 1 Baseline characteristics of interviewees) |
| <i>Data collection</i>           |                                                                                   |                                                                                                                                                                                                                   |
| 17. Interview guide              | Were questions, prompts, guides provided by the authors? Was it pilot tested?     | Yes, there are questions provided in the interview guide. Yes, the interview guide was pilot tested in 2 participants<br>(Data collection, page 8)                                                                |
| 18. Repeat interviews            | Were repeat inter views carried out? If yes, how many?                            | No repeat interviews<br>(Participant characteristics, Page 10)                                                                                                                                                    |
| 19. Audio/visual recording       | Did the research use audio or visual recording to collect the data?               | Audio recording<br>(Data collection, page 8)                                                                                                                                                                      |
| 20. Field notes                  | Were field notes made during and/or after the inter view or focus group?          | Yes; field notes were made during the interview.<br>(Data collection, page 8)                                                                                                                                     |
| 21. Duration                     | What was the duration of the inter views or focus group?                          | The interviews ranged between 20 to 90 minutes<br>(Data collection, page 8)                                                                                                                                       |
| 22. Data saturation              | Was data saturation discussed?                                                    | Yes<br>(Data collection, page 8)                                                                                                                                                                                  |

|                                        |                                                                                                                                 |                                                                                                                                                     |
|----------------------------------------|---------------------------------------------------------------------------------------------------------------------------------|-----------------------------------------------------------------------------------------------------------------------------------------------------|
| 23. Transcripts returned               | Were transcripts returned to participants for comment and/or correction?                                                        | No.<br>(Not reported in the paper)                                                                                                                  |
| <b>Domain 3: analysis and findings</b> |                                                                                                                                 |                                                                                                                                                     |
| <b>Data analysis</b>                   |                                                                                                                                 |                                                                                                                                                     |
| 24. Number of data coders              | How many data coders coded the data?                                                                                            | 2 coders (Data analysis, Page 9)                                                                                                                    |
| 25. Description of the coding tree     | Did authors provide a description of the coding tree?                                                                           | Yes (Table 2 themes and subthemes)                                                                                                                  |
| 26. Derivation of themes               | Were themes identified in advance or derived from the data?                                                                     | Themes were identified in advance, using the REAIM framework for program evaluation.<br>(Data analysis, Page 8)                                     |
| 27. Software                           | What software, if applicable, was used to manage the data?                                                                      | NVivo Version 14<br>(Data analysis, Page 8)                                                                                                         |
| 28. Participant checking               | Did participants provide feedback on the findings?                                                                              | Participant checking was performed but there was no significant feedback<br>(Data analysis, Page 9)                                                 |
| <b>Reporting</b>                       |                                                                                                                                 |                                                                                                                                                     |
| 29. Quotations presented               | Were participant quotations presented to illustrate the themes/findings? Was each quotation identified? e.g. participant number | Yes. Participant quotations were presented to illustrate the theme and findings and each quotation was identified<br>(Table 2 themes and subthemes) |
| 30. Data and findings consistent       | Was there consistency between the data presented and the findings?                                                              | Yes. There was consistency between data presented and the findings<br>(See Results [Page 10-12] and Table 2 themes and subthemes)                   |
| 31. Clarity of major themes            | Were major themes clearly presented in the findings?                                                                            | Major themes were clearly presented in the findings.<br>(Table 2 themes and subthemes)                                                              |
| 32. Clarity of minor themes            | Is there a description of diverse cases or discussion of minor themes?                                                          | There is a discussion of a minor themes<br>(contextual considerations, page 11-12)                                                                  |
